# Supplementary material for: Critical role of interfacial effects on the reactivity of semiconductor-cocatalyst junctions for photocatalytic oxygen evolution from water
Source: Royal Society of Chemistry journal article supplement (doi:10.1039/c6cy00548a), 2016-01-01
Supplement: c6cy00548a1.pdf [file c6cy00548a1.pdf]

## Supporting Information

### Critical Role of Interfacial Effects on the Reactivity of Semiconductor-Cocatalyst Junctions for Photocatalytic Oxygen Evolution from Water

*John C. Matsubu<sup>‡†</sup>, Eric T. Lin<sup>‡†</sup>, Kyle L. Gunther<sup>†</sup>, Krassimir N. Bozhilov<sup>⊥</sup>, Yibo Jiang<sup>†</sup>,  
Phillip Christopher<sup>†, #, §, \*</sup>*

<sup>†</sup>Department of Chemical & Environmental Engineering, University of California,  
Riverside, Riverside, California 92521, United States

<sup>⊥</sup>Central Facility for Advanced Microscopy and Microanalysis, University of California,  
Riverside, California 92521

<sup>#</sup>Program in Materials Science, University of California, Riverside, Riverside, CA 92521,  
USA.

<sup>§</sup>UCR Center for Catalysis, University of California, Riverside, Riverside, CA 92521,  
USA.

\*Corresponding Author E-mail: christopher@engr.ucr.edu

#### Contents

**Table S1:** Calcination times and temperatures

**Table S2:** SC crystal structures and lattice parameters from XRD

**Table S3:** CC crystal structures and conductivity

**Figure S1:** Lamp spectral output plot

**Figure S2:** O<sub>2</sub> accumulation plot

**Figure S3:** SC OER Rates

**Figure S4:** Kubelka-Munk plot

**Figure S5:** HAADF STEM-IrO<sub>x</sub>/ZnO

**Figure S6:** HAADF STEM-IrO<sub>x</sub>/SnO<sub>2</sub>

**Figure S7:** HAADF STEM-CoO<sub>x</sub>/BiVO<sub>4</sub>

**Figure S8:** HAADF STEM-CoO<sub>x</sub>/ZnO

**Figure S9:** HAADF STEM-CoO<sub>x</sub>/SnO<sub>2</sub>

**Figure S10:** Weight loading dependent OER rates for CCs on ZnO

**Table S1.** Temperature and duration of sample calcination in air during CC synthesis on the SCs.

| Co-Catalyst      | Temperature (°C) | Hours |
|------------------|------------------|-------|
| IrO <sub>x</sub> | 550              | 5     |
| MnO <sub>x</sub> | 400              | 2     |
| RuO <sub>x</sub> | 400              | 6     |
| NiO <sub>x</sub> | 400              | 3     |
| CoO <sub>x</sub> | 500              | 2     |

**Table S2.** SC Crystal structures and lattice parameters determined from XRD

|                    | BiVO <sub>4</sub> | ZnO                  | SnO <sub>2</sub>    |
|--------------------|-------------------|----------------------|---------------------|
| Crystal Structure  | Monoclinic        | Wurtzite (hexagonal) | Rutile (Tetragonal) |
| Lattice Constant A | 5.19              | 3.25                 | 4.72                |
| Lattice Constant B | 5.09              | -                    | -                   |
| Lattice Constant C | 11.70             | 5.20                 | 3.19                |

**Table S3.** CC crystal structures and lattice parameters of SC and CC determined from previous studies.

|                                   | RuO <sub>2</sub> | IrO <sub>2</sub> | MnO <sub>2</sub> | Co <sub>3</sub> O <sub>4</sub> | NiO       |
|-----------------------------------|------------------|------------------|------------------|--------------------------------|-----------|
| Crystal Structure <sup>1</sup>    | Rutile           | Rutile           | Rutile           | Spinel                         | Rock Salt |
| Lattice Constant A <sup>1,2</sup> | 4.50             | 4.51             | 4.40             | 8.08                           | 4.18      |
| Lattice Constant C <sup>1,2</sup> | 3.10             | 3.16             | 2.87             | -                              | -         |
| Conduction Type <sup>1</sup>      | Metallic         | Metallic         | Semi             | Semi                           | Semi      |

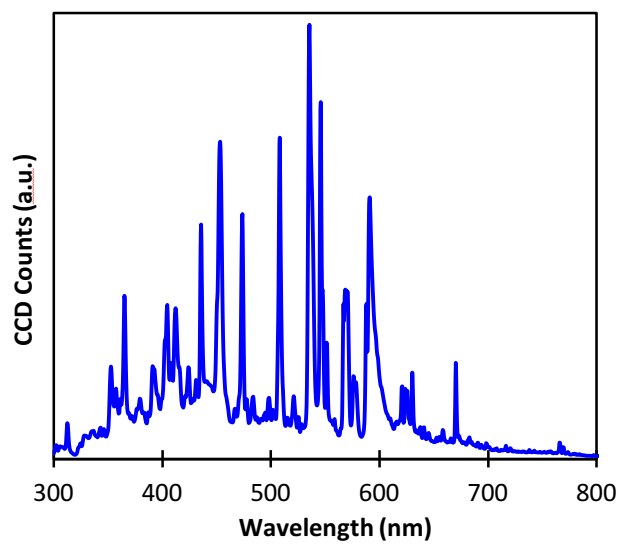

**Figure S1.** Spectral output of metal halide lamp (MH100A)

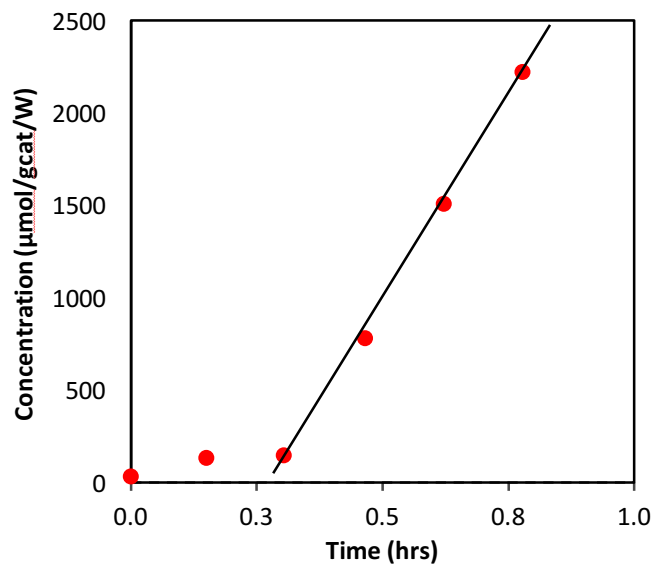

**Figure S2.** Typical  $\text{O}_2$  accumulation plot, where slope of accumulation at onset of reactor illumination was used to determine OER rate.

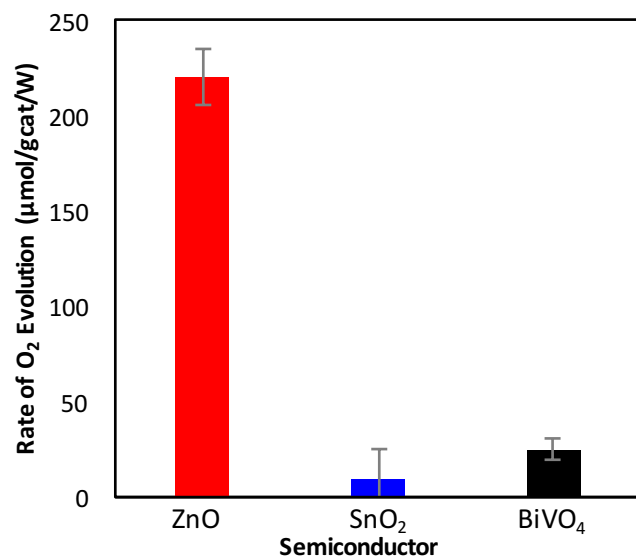

**Figure S3.** Rate of OER rate normalized per gram catalyst and power of lamp for ZnO, SnO<sub>2</sub>, and BiVO<sub>4</sub> SCs. The rates for each SC were determined from the slope of the O<sub>2</sub> accumulation vs time plots similar to fig S2. Error bars were determined from testing the performance of each catalyst sample twice.

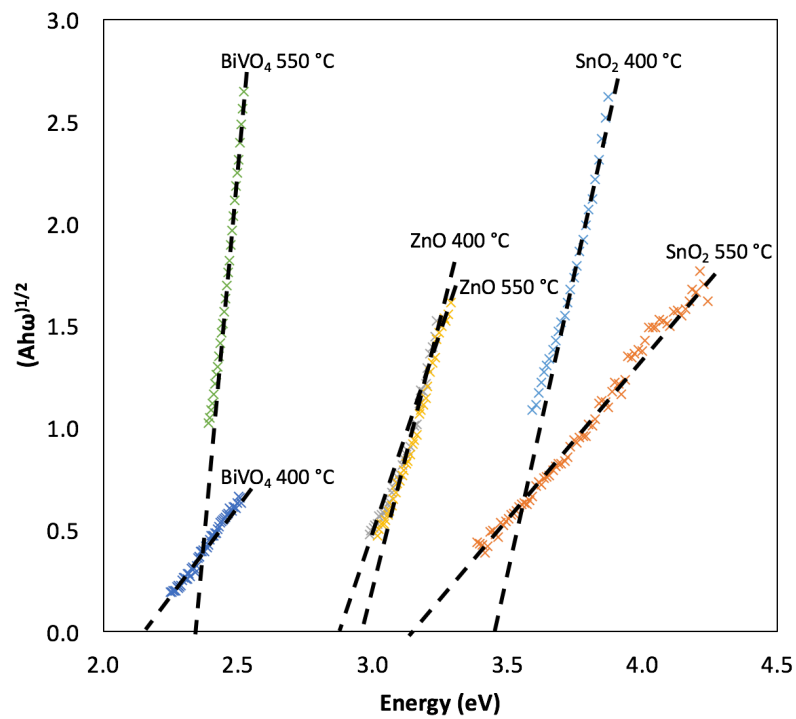

**Fig S4.** Plot of Kubelka-Munk function used to calculate band gap energies for SC pretreated at different conditions during CC synthesis.

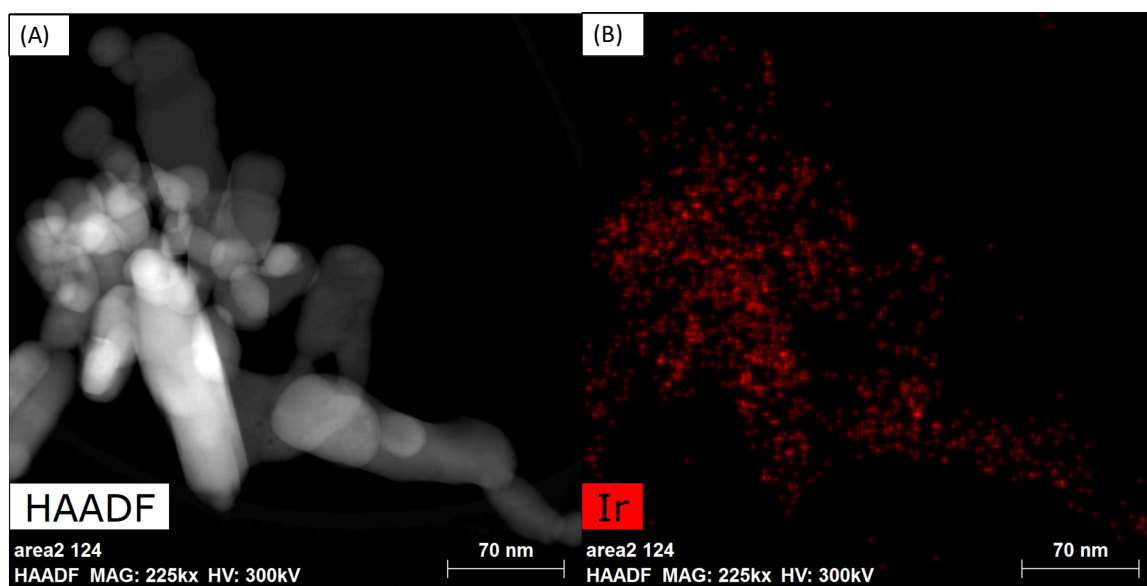

**Figure S5.** (A) HAADF STEM analysis of 1% IrO<sub>x</sub>/ZnO. (B) Corresponding EDS map showing high IrO<sub>x</sub> dispersion with particle sizes < 5nm.

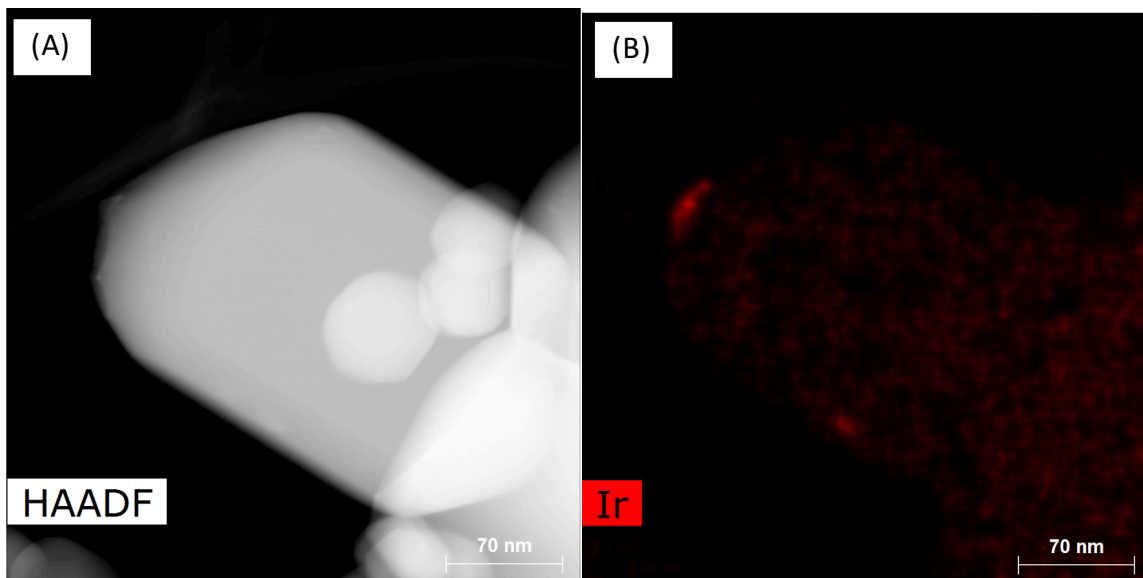

**Figure S6.** (A) HAADF STEM analysis of 1% IrO<sub>x</sub>/SnO<sub>2</sub>. (B) Corresponding EDS map showing high IrO<sub>x</sub> dispersion with particle sizes < 5nm.



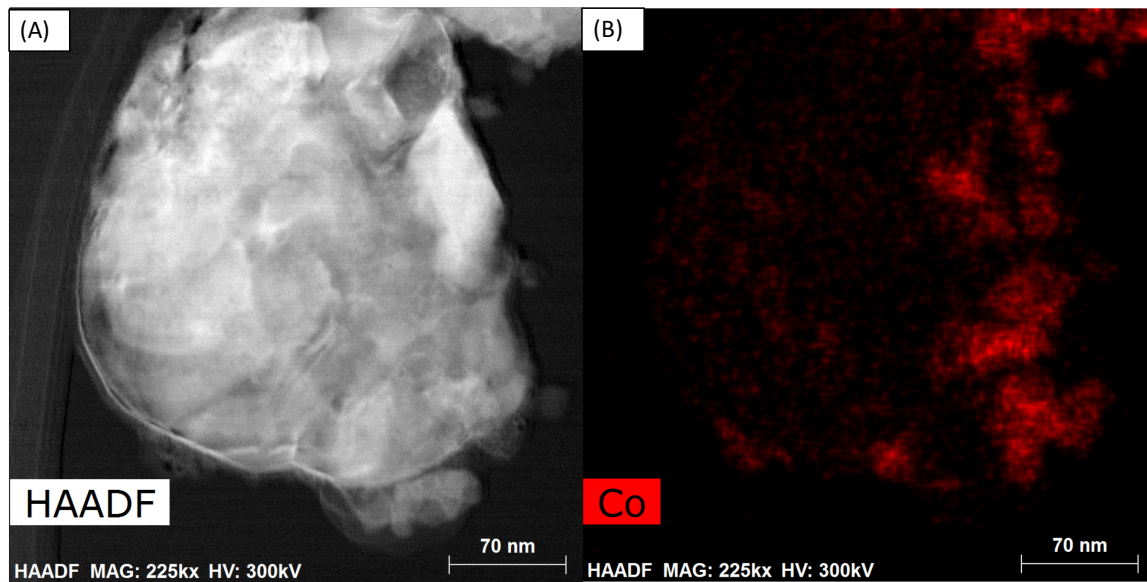

**Figure S7.** (A) HAADF STEM analysis of 1% CoO<sub>x</sub>/BiVO<sub>4</sub>. (B) Corresponding EDS map indicating Co NPs were present on the SC surface with particle and/or particle aggregations with sizes from <5nm up to 70nm.

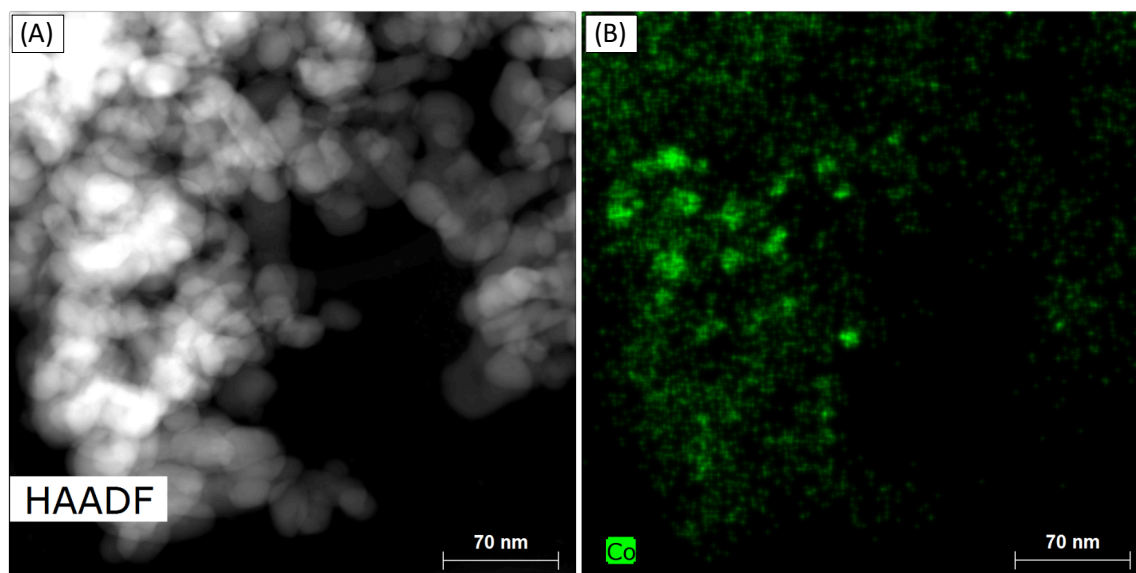

**Figure S8.** (A) HAADF STEM analysis of 1%  $\text{CoO}_x/\text{ZnO}$ . (B) Corresponding EDS map indicating Co NPs were present on the SC surface with particle and/or particle aggregations with sizes from  $<2\text{nm}$  up to  $\sim 20\text{nm}$ .

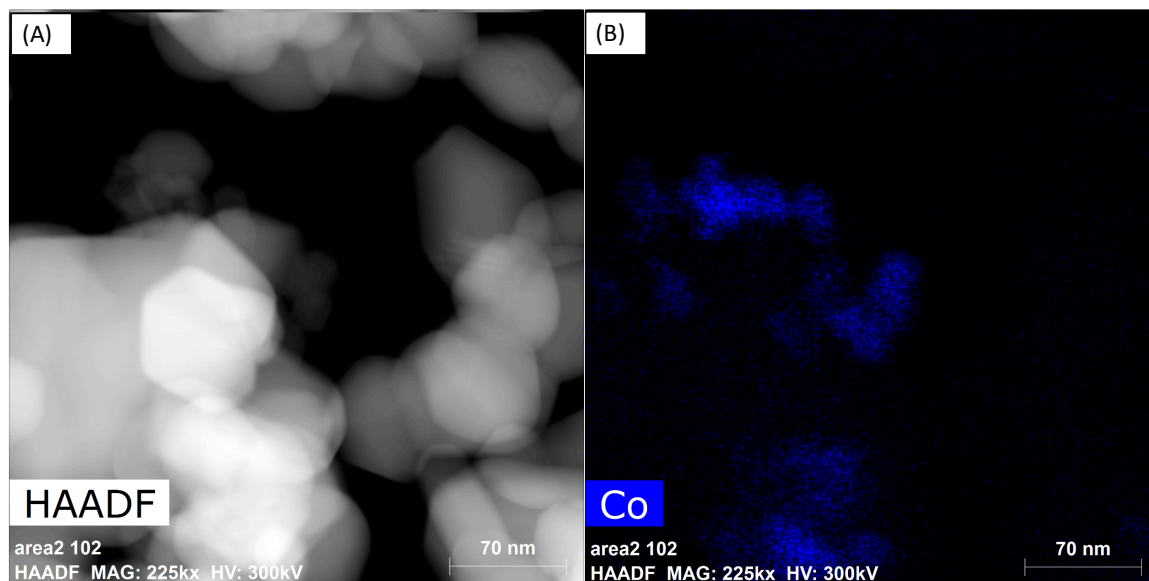

**Figure S9.** (A) HAADF STEM analysis of 1%  $\text{CoO}_x/\text{SnO}_2$ . (B) Corresponding EDS map showing  $\text{CoO}_x$  formed large NPs or aggregates on  $\text{SnO}_2$  of 15-70nm.

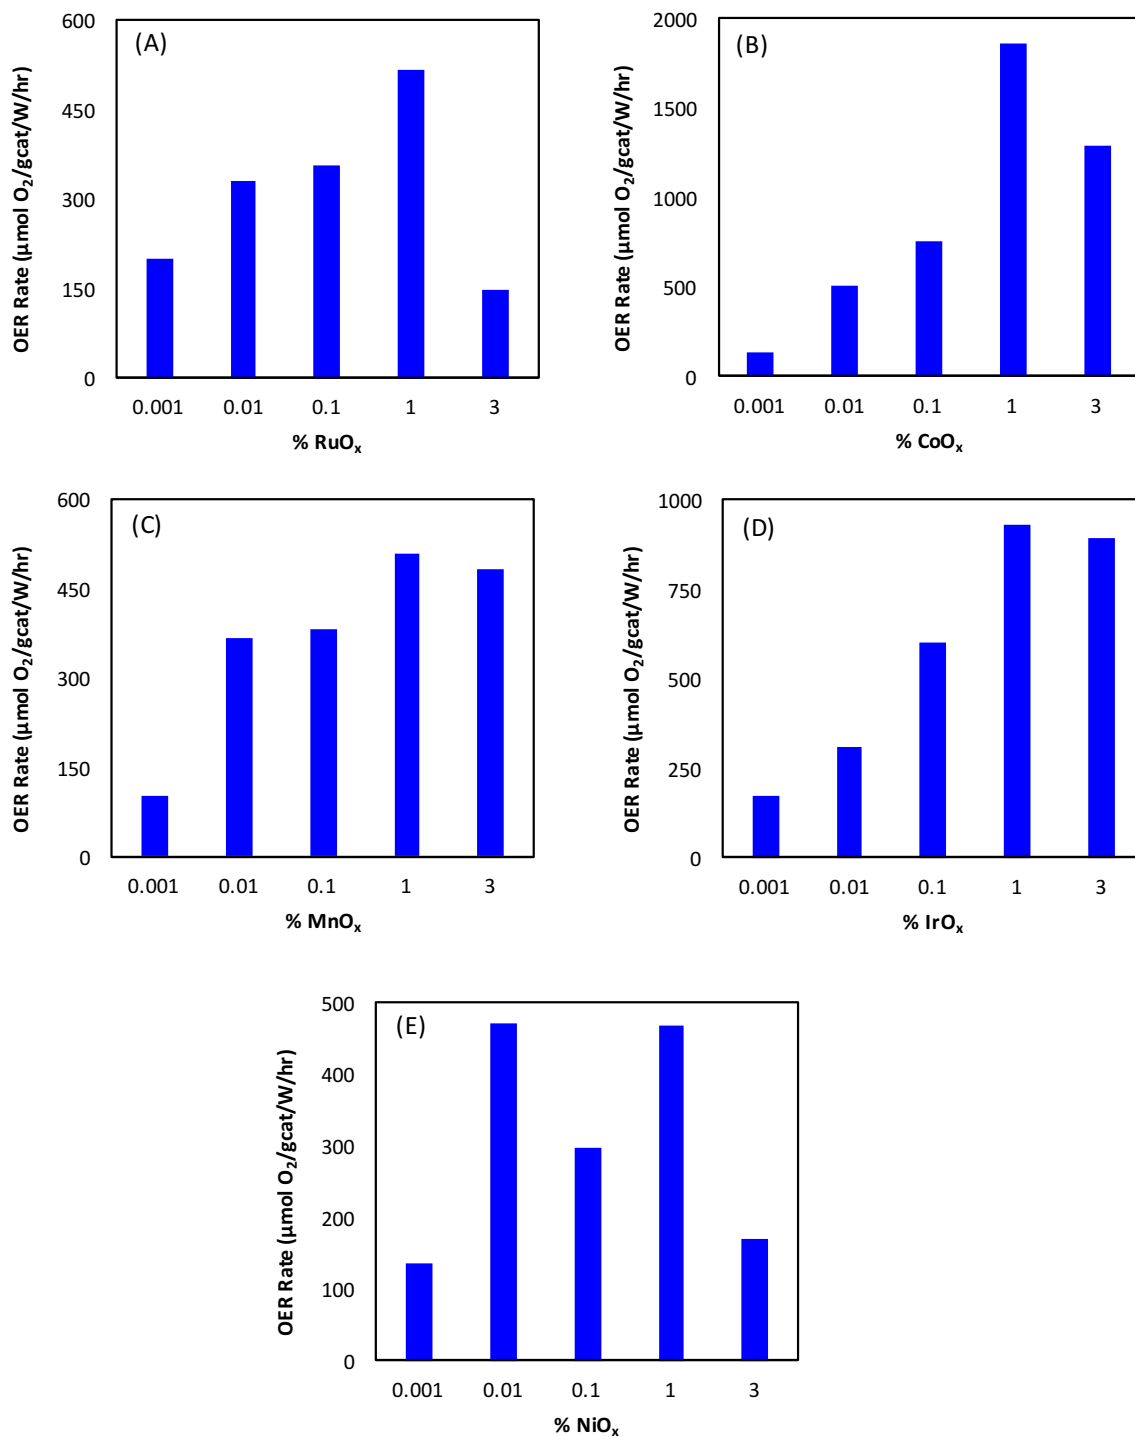

**Figure S10.** OER rates for varying CC weight loadings on ZnO SC with CCs: (A) RuO<sub>x</sub>, (B) CoO<sub>x</sub>, (C) MnO<sub>x</sub>, (D) IrO<sub>x</sub> and, (E) NiO<sub>x</sub>

These samples were illuminated with 365nm light causing the rate per watt of illumination ~3-fold larger than the OER rates in Fig. 3.

## References

1. A. Bolzan, C. Fong, B. J. Kennedy and C. J. Howard, *Acta Crystallogr. Sect. B*, 1997, **B53**, 373–380.
2. N. R. Rao and G.V. Subba Rao, *Transition Metal Oxides: Crystal Chemistry, Phase Transition, and Related Aspects*; U.S. Govt. Print. Off: Washington., 1974.
